# Supplementary material
Source: Elsevier journal article supplement (https://www.sciencedirect.com/science/article/pii/S1695403321002071)
Supplement: mmc1 [file S1695403321002071:mmc1.doc]

**­Anexo 1. Miembros del grupo de trabajo grupo de trabajo de pediatría Basada en la Evidencia de la AEP y AEPap que han participado en este documento**:

- Pilar Aizpurua Galdeano. Centro de salud Ondarreta. San Sebastián.
- María Aparicio Rodrigo. Centro de salud Entrevías. Madrid.
- Jaime Javier Cuervo Valdés. Centro de salud Ciudad Jardín. Badajoz.
- Ana Isabel Díaz Cirujano. Centro de salud Rosa Luxemburgo. Madrid.
- María Jesús Esparza Olcina. Madrid.
- María Mercedes Fernández Rodríguez. Centro de salud Potes. Madrid.
- Paz González Rodríguez. Centro de salud Barrio del Pilar. Madrid
- Blanca Juanes de Toledo. Centro de salud Collado Villalba. Madrid.
- Victoria Martínez Rubio. Centro de salud Los Fresnos. Torrejón de Ardoz. Madrid
- Eduardo Ortega Páez. UGC Maracena. Distrito Metropolitano. Granada.
- Leo Perdikidis Olivieri. Centro de salud Juncal. Torrejón de Ardoz. Madrid.
- Enrique Rodríguez-Salinas Pérez. Centro de salud Colmenar Viejo Norte. Madrid
- Juan Ruíz-Canela Cáceres. Sevilla.
- María Salomé Albi Rodríguez. Hospital Universitario 12 de Octubre. Madrid.
- Sergio Flores Villar. Hospital Universitario Mutua de Terrassa, Barcelona.
- Álvaro Gimeno Díaz de Atauri. Hospital Universitario 12 de Octubre. Madrid
- Javier González de Dios. Hospital General Universitario de Alicante. Alicante.
- Rafael Martin Massot. Hospital Regional Universitario de Málaga. Málaga
- Carlos Ochoa Sangrador. Complejo Asistencial de Zamora. Zamora
- Giordano Pérez Gaxiola. Hospital Pediátrico de Sinaloa "Dr. Rigoberto Aguilar Pico". México
- Begoña Pérez-Moneo Agapito. Hospital Universitario Infanta Leonor. Madrid
- María José Rivero Martín. Hospital Universitario de Fuenlabrada, Madrid
